# Supplementary material for: Rational combination of oncolytic vaccinia virus and PD-L1 blockade works synergistically to enhance therapeutic efficacy
Source: PubMed Central journal article supplement (PMC5378974; doi:10.1038/ncomms14754), 2017-03-27
Supplement: ncomms14754-s1.pdf [file ncomms14754-s1.pdf]

## Supplementary Figures

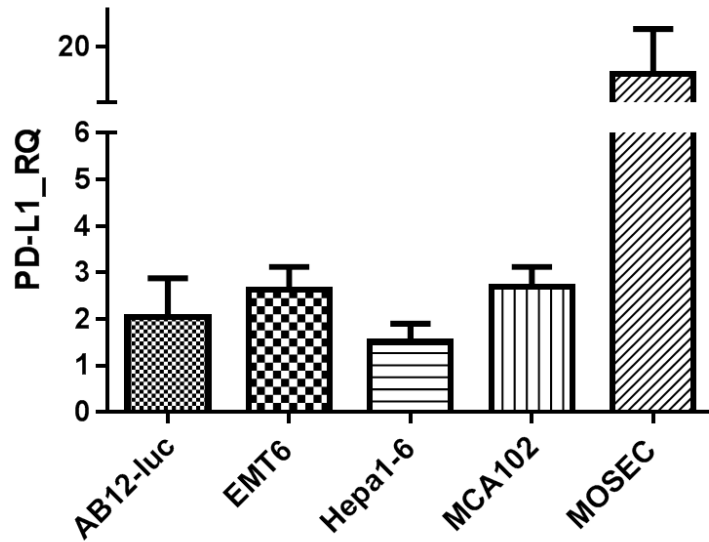

**Supplementary Figure 1. PD-L1 is elevated post vvDD treatment in other murine cancer cells *in vitro*.** Murine AB12-luc, EMT6, Hepa1-6, MCA102, and MOSEC cancer cells were infected with vvDD. The infected cells were harvested 24 h post infection to make RNA for RT-qPCR assay to determine relative PD-L1 expression.

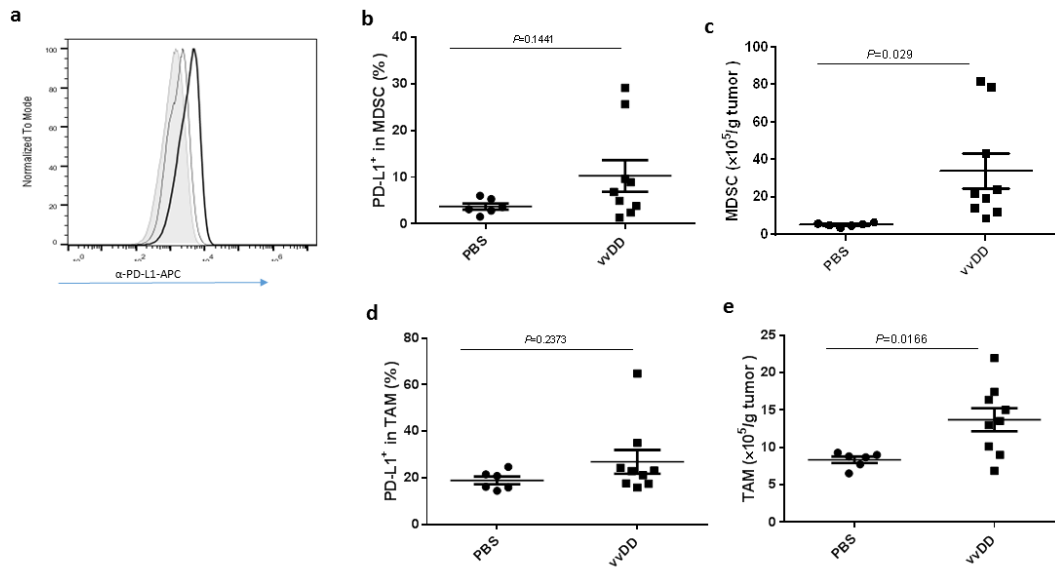

**Supplementary Figure 2. PD-L1 is impacted in MDSC and TAM post vvDD treatment *in vivo*.** B6 mice were subcutaneously inoculated with MC38-luc cells ( $4 \times 10^5$  cells). PBS or vvDD was intratumorally injected at  $2 \times 10^8$  pfu/tumor when the s.c tumor area reached  $5 \times 5$  mm<sup>2</sup>. Tumor tissues were collected from PBS or virus-treated mice 4 days post the treatment. Collected tumor tissues were weighed and incubated in RPMI 1640 containing 2% FBS, 1 mg/ml collagenase, 0.1 mg hyaluronidase, and 200 U DNase I at 37°C for 1-2h to make single cells. The single cells were blocked with  $\alpha$ -CD16/32 Ab and then stained with antibodies against CD45, CD11b, Gr1, PD-L1, F4/80 to determine PD-L1 expression on CD45<sup>+</sup> cells, tinted: Ab isotype; (a). hairline: PBS-treated; normal: vvDD-treated; (b,c). MDSC (CD45<sup>+</sup>CD11b<sup>+</sup>Gr1<sup>+</sup>); (d, e); TAM (CD45<sup>+</sup>CD11b<sup>+</sup>F4/80<sup>+</sup>). Student's *t*-test was used to analyze the data.

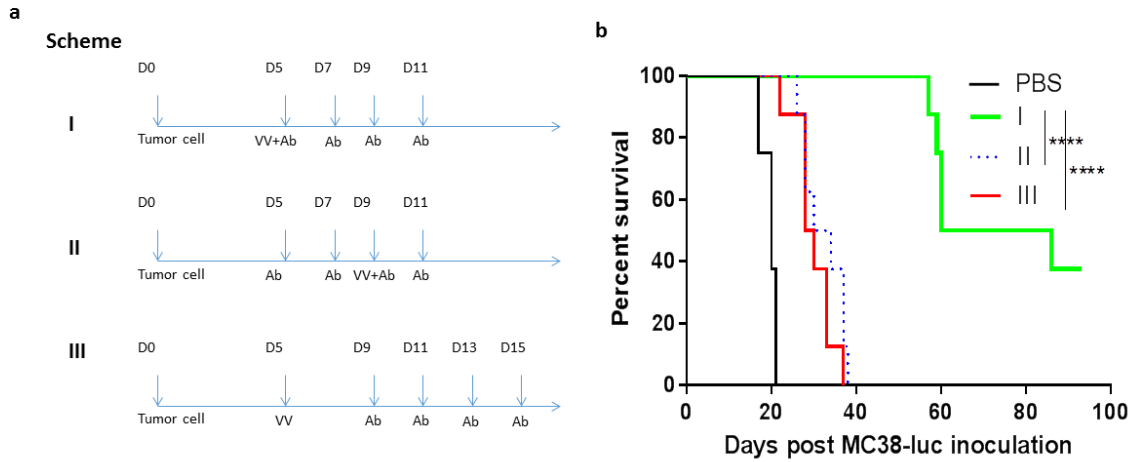

**Supplementary Figure 3. Simultaneous treatment with VV-CXCL11 plus  $\alpha$ -PD-L1 is more effective at early treatment time points.** (a). B6 mice were intraperitoneally inoculated with  $5 \times 10^5$  MC38-luc and treated with VV-CXCL11 +  $\alpha$ -PD-L1 as per the timelines, and (b). The survival data was shown. The survival was monitored by Kaplan-Meier analysis and statistical analyses were performed with Log rank test. In all of the figures, the standard symbols for *P* values are, \*  $P < 0.05$ ; \*\*  $P < 0.01$ ; \*\*\*  $P < 0.001$ ; and \*\*\*\*  $P < 0.0001$ ; and ns: not significant.

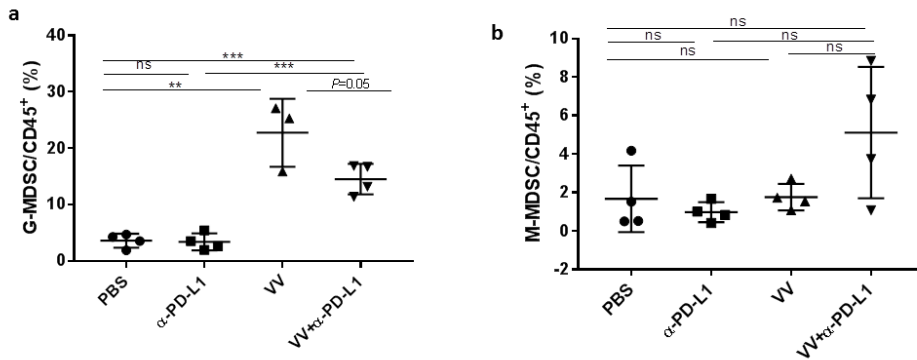

**Supplementary Figure 4. Vaccinia virus treatment elevates G-MDSC in TME.** B6 mice were intraperitoneally inoculated with  $5 \times 10^5$  MC38-luc cells and treated with VV (short-named for vvDD-CXCL11) and/or  $\alpha$ -PD-L1 as described. Tumor-bearing mice were sacrificed at day 5 post first treatment and primary tumors were collected and analyzed as Figure 5 for G-MDSC and M-MDSC in TME. Student's *t*-test was used to analyze the significance of the differences.

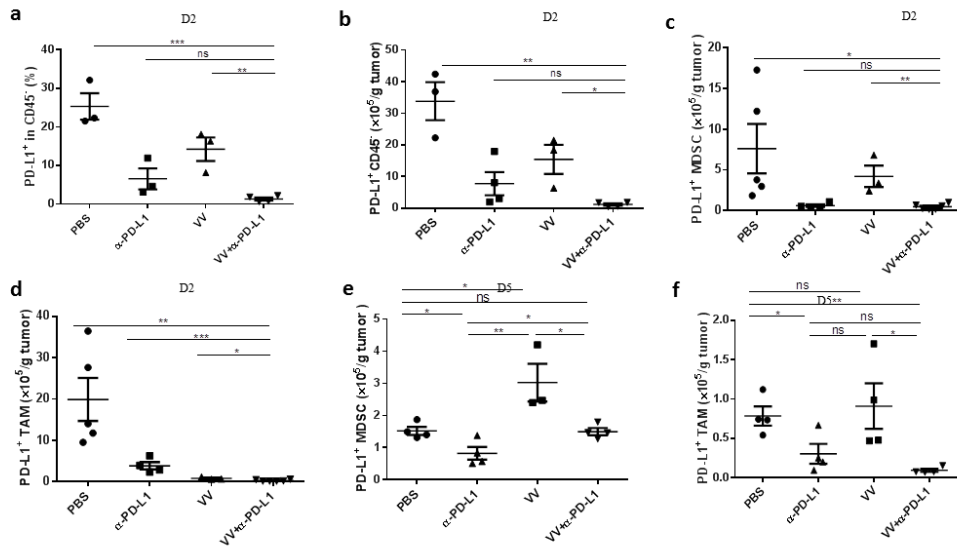

**Supplementary Figure 5. The  $\alpha$ -PD-L1 treatment reduces the PD-L1<sup>+</sup> cells in TME.** C57BL/6 mice were intraperitoneally inoculated with  $5 \times 10^5$  MC38-luc and treated with VV-CXCL11 and/or  $\alpha$ -PD-L1 as described. Tumor-bearing mice were sacrificed at day 2 or day 5 post first treatment and primary tumors were collected and analyzed as Figure 2 to determine the PD-L1<sup>+</sup> tumor cells (a,b), PD-L1<sup>+</sup> MDSC (c, e) PD-L1<sup>+</sup> TAM (d, f) in the TME. Student's *t*-test was used to analyze the significance of the differences.

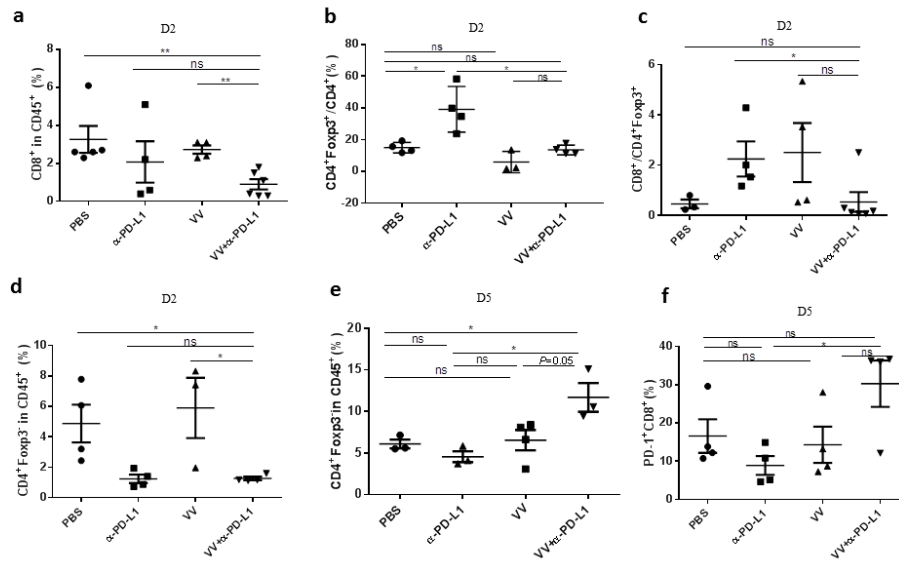

**Supplementary Figure 6. The combination of VV plus  $\alpha$ -PD-L1 treatment impacts tumor-infiltrating effector T cells in TME.** B6 mice were intraperitoneally inoculated with  $5 \times 10^5$  MC38-luc and treated with VV and/or  $\alpha$ -PD-L1 as described. Single cells were made from primary tumors collected from tumor-bearing mice at day 2 or day 5 post first treatment as Figure 2, blocked with  $\alpha$ -CD16/32 Ab and then stained with antibodies against CD45, CD8, CD4 and Foxp3 to determine the CD8<sup>+</sup> T cells (a), CD4<sup>+</sup>Foxp3<sup>+</sup> (b), CD8<sup>+</sup>/CD4<sup>+</sup>Foxp3<sup>+</sup> (c), CD4<sup>+</sup>Foxp3<sup>-</sup> (d, e) and PD-1<sup>+</sup> CD8<sup>+</sup> (f) in the TME. Student's *t*-test was used to analyze the significance of the differences.

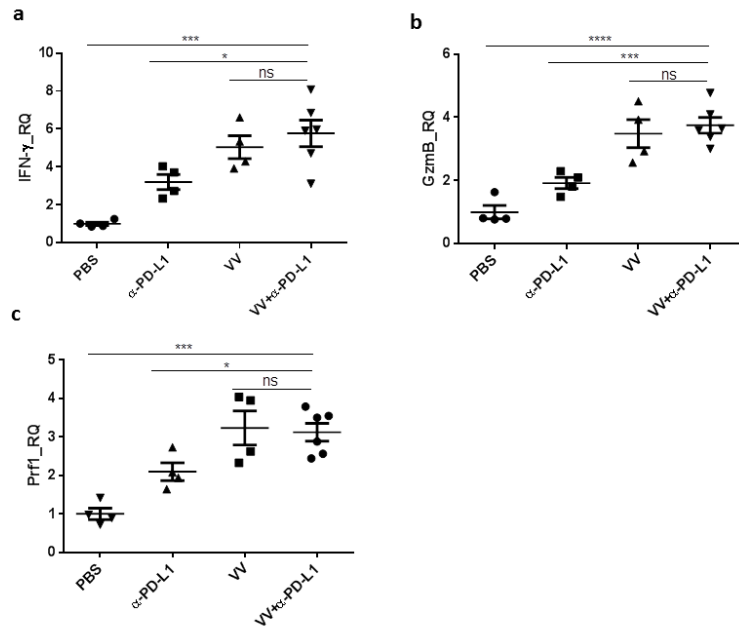

**Supplementary Figure 7. The combination therapy of VV plus  $\alpha$ -PD-L1 increases immune-favorable molecules in the TME.** B6 mice were intraperitoneally inoculated with  $5 \times 10^5$  MC38-luc and treated with VV-CXCL11 and/or  $\alpha$ -PD-L1 as described. RNA extracted from tumor tissues collected from tumor-bearing mice at day 2 post first treatment was used for RT-qPCR assay to determine IFN- $\gamma$  (a), Granzyme B (b) and perforin (c) in the TME. Student's *t*-test was used to analyze the significance of the differences. The standard symbols for *P* values are, \*  $P < 0.05$ ; \*\*  $P < 0.01$ ; \*\*\*  $P < 0.001$ ; and \*\*\*\*  $P < 0.0001$ .
